## ERRATUM

**Roles of *PIN-FORMED1* and *MONOPTEROS* in pattern formation of the apical region of the *Arabidopsis* embryo**

**Aida, M., Vernoux, X., Furutani, M., Traas, J. and Tasaka, M. (2002). *Development* 129, 3965-3974.**

On page 3972 of this article, the sentence “This raises the possibility that the effect of *STM* on *CUC1* activity starts much earlier.” should read “This raises the possibility that the effect of *STM* on *CUC1* activity starts much earlier than previously thought.”
